# Supplementary material
Source: publisher site journal article supplement (http://www.degruyter.com/publication/journal_key/GEO/downloadAsset/GEO_Instruction_for_Authors_2024.pdf)
Supplement: Supplementary file 1 [file GEO_Instruction_for_Authors_2024.pdf]

INSTRUCTION FOR AUTHORS

---

**ABOUT**

**Open Geosciences** is an international single-blind peer-reviewed open access journal that publishes original research, reviews and news in the emerging field of Earth Sciences. Our central goal is to provide a hub for researchers working across all species to present their discoveries, and to be a forum for the discussion of the important issues in the field. The journal accommodates a variety of exposition styles and formats to help scientists with diverse backgrounds interact.

Open Geosciences has article processing charges (APCs) – 1500 EURO (plus VAT (if applicable), plus money transfer charges). For more information please read Article Processing Charges document available in the supplementary information section on the journal homepage.

**PUBLICATION FORMATS**

Open Geosciences considers submissions of:

- Research Articles,
- Communications,
- Rapid Communications\*,
- Reviews, and Commentaries
- Letters to the Editor,
- Erratum,
- Retraction Note.

\*Rapid Communications are intended to present information of exceptional novelty and exciting results of significant interest to the readers. Authors are asked to provide an explanation in the cover letter why their contribution should be handled via the rapid channel.

**ELECTRONIC SUBMISSION**

All submissions must be made via online submission system Editorial Manager (<https://www.editorialmanager.com/opengeo/>).

Manuscripts submitted under multiple authorship are reviewed on the assumption that all listed authors concur in the submission and are responsible for its content; they must have agreed to its publication and have given the corresponding author the authority to act on their behalf in all matters pertaining to publication. The corresponding author is responsible for informing the coauthors of the manuscript status throughout the submission, review, and production process.

**Electronic Formats Allowed**

We accept submission of text, tables and figures as separate files or as a composite file. For your initial submission, we recommend you upload your entire manuscript, including tables and figures, as a single PDF file. If you are invited to submit a revised manuscript, please provide us with individual files: an editable text and publication-quality figures.

**Text files** can be submitted in the following formats: MS Word - standard DOCUMENT (.DOC) or RICH TEXT FORMAT (.RTF); PDF (not applicable for re-submitted or accepted manuscripts, see below).

**Tables** should be submitted as MS Word or PDF (not applicable for re-submitted or accepted manuscripts, see below). Please note that a straight Excel file is not an acceptable format.

**Graphics files** can be submitted in any of the following graphic formats: EPS; BMP; JPG; TIFF; GIF or PDF. Please note that Powerpoint files are not accepted.

Any articles that have been prepared in LaTeX will be accepted for review, but only in PDF format. Post-acceptance, text files of the revised manuscript and tables are required for use in the production. Authors should clearly indicate the location(s) of tables and figures in the text if these elements are given separately or at the end of the manuscript. If this information is not provided to the editorial office, we will assume that they should be left at the end of the text.

### **First-time Submission of Manuscripts**

It is important that authors include a cover letter with their manuscript. Please explain why you consider your manuscript to be suitable for publication in Open Geosciences, why your paper will inspire the other members of your field, and how will it drive research forward.

The letter should contain all important details such as:

- your full name (submitted by)
- full title of article and short title
- full list of authors with affiliations
- e-mail of the corresponding author
- contact address, telephone/fax numbers of the corresponding author
- number of attached files, if there is more than one
- status: new, reviewed or accepted (with reference ID if reviewed or accepted)

The cover letter should explicitly state that the manuscript (or one with substantially the same content, by any of the authors) has not been previously published in any language anywhere and that it is not under simultaneous consideration or in press by another journal. If related work has been submitted, then we may require a preprint to be made available. Reviewers will be asked to comment on the overlap between the related submissions. Manuscripts that have been previously rejected, or withdrawn after being returned for modification, may be resubmitted if the major criticisms have been addressed. The cover letter must state that the manuscript is a resubmission, and the former manuscript number should be provided.

To ensure fair and objective decision-making, authors must declare any associations that pose a conflict of interest in connection with evaluated manuscripts (see Editorial Policy for details). Authors may suggest up to two referees not to use, and in such cases additional justification should be provided in the cover letter. Authors are encouraged to recommend up to five reviewers who are not members of their institution(s) and have never been associated with them or their laboratory(ies); please provide contact information for suggested reviewers. The Editors reserve the right to select expert reviewers at their discretion.

### **Submission of Revised Articles**

Resubmitted manuscripts should be accompanied by a letter outlining a point-by-point response to Editor's and reviewers' comments and detailing the changes made to the manuscript. A copy of the original manuscript should be included for comparison if the Journal Editor requests one. If it is the first revision, authors need to return the revised manuscript within 28 days; if it is the second revision, authors need to return the revised manuscript within 14 days. Additional time for resubmission must be requested in advance. If the above mentioned deadlines are not met, the manuscript will be treated as a new submission.

For resubmitted manuscripts, please provide us with an editable text and publication-quality figures: Tables also need to be included within an editable article file or be submitted separately as editable files. Supply any figures as separate high-resolution, print-ready digital versions.

For a revision, two copies of the main document are requested. The first copy should represent the final “clean” copy of the manuscript. The second - “annotated” copy should have changes tracked using the track changes function in the text editor, so all modifications can more easily be followed.

In addition to the editorial remarks, authors are asked to take care that they have prepared the revised version according to the Journal's style. Please adopt numbered citation (citation-sequence) style referencing.

## PREPARATION OF MANUSCRIPTS

It is essential that contributors prepare their manuscripts according to the instructions and specifications presented below.

### General rules for writing

The work must demonstrate its novelty and its interest to geoscientists in general. Conclusions must be justified by the study; please make your argumentation complete and be self-critical as you review your drafts.

Open Geosciences encourages the submission of both substantial full-length bodies of work and shorter manuscripts that report novel findings that might be based on a more limited range of experiments. There are no specific length restrictions for the overall manuscript or individual sections; however, we urge the authors to present and discuss their findings in a concise and accessible manner.

Use simple, declarative sentences and commonly understood terms; avoid long sentences and idle words. Please use active voice while writing your manuscript; e.g. ‘we measured snout-vent length’ rather than ‘snout-vent length was measured. We recommend that for clarity you use the past tense to narrate particular events in the past, including the procedures, observations, and data of the study that you are reporting. Use the present tense for your own general conclusions, the conclusions of previous researchers, and generally accepted facts. Thus, most of the Abstract, Methods, and Results should be in the past tense, and most of the Introduction and some of the Discussion should be in the present tense. Editors may make suggestions for how to improve clarity and readability, as well as to strengthen the argument.

### Organization of the Manuscript

Articles should be organized into the following sections:

- Title page with: Title (and running title)
- Abstract
- Keywords
- Introduction
- Methods
- Results
- Discussion
- Acknowledgments
- Author Contributions
- References
- Figure Legends and Table Captions
- Tables
- Figures
- Supplemental data (if applicable)

Each of these elements is detailed below. We draw particular attention to the importance of carefully preparing the title, keywords and abstract, as these elements are indicators of the manuscript content in bibliographic databases and search engines.

## Title

We suggest the title should be informative, specific to the project, yet concise (75 characters or fewer). Please bear in mind that a title that is comprehensible to a broad scientific audience and readers outside your field will attract a wider readership. Avoid specialist abbreviations and non-standard acronyms. Titles should not be presented in title case (words should not be capitalized). Please also provide a brief "running title" of not more than 50 characters.

## Authors, Affiliations, Addresses

In the cover letter, provide the first names (or initials - if used), middle names (or initials - if used), and surnames for all authors. Affiliations should include:

- Department
- University or organization
- City
- Postal code
- State/province (if applicable)
- Country

One of the authors should be designated as the corresponding author to whom inquiries regarding the paper should be directed. It is the corresponding author's responsibility to ensure that the author list and the summary of the author contributions to the study are accurate and complete. Place an asterisk after the name of the corresponding author and provide us with a valid e-mail address. Please note that a change in authorship (order of listing, addition or deletion of a name, or corresponding author designation) after submission of the manuscript will be implemented only after receipt of signed statements of agreement from all parties involved. Footnotes can be used to present additional information (for example: permanent, adequate, present postal addresses). If the article has been submitted on behalf of a consortium, all consortium members and affiliations should be listed after the Acknowledgments.

## Abstract and Image accompanying abstract (Graphical Abstract)

The abstract should not exceed 200 words. The abstract should give a summary of the content of the paper and is usually conceptually divided into: Background, Methodology, Principal Findings/Results, and Conclusions/Significance. Mention the techniques used without going into methodological detail and summarize briefly the most important items of the paper. Please do not include any citations or references to tables or figures, and avoid specialist abbreviations and symbols. Because the abstract will be published separately by abstracting services, it must be complete and understandable without reference to the text.

Authors may provide a striking image to accompany their article, if one is available. If the image (photo, graph, scheme) is judged by the editors to be suitable for publication, it may be featured on the web to highlight the paper online. It is preferable, but not essential, that these should be related strictly to the subject reported in the manuscript. The image could originate from the experimental findings reported in the manuscript but does not have to constitute a part of the original work and need not be reprinted in the article. Images must be original and should be submitted as separate files.

## Keywords

List keywords for the work presented (maximum of 10), separated by commas. We suggest that keywords do not replicate those used in the title. Authors should use keywords that are specific and emphasize what is essential in the presented study.

## Introduction

The introduction should put the focus of the manuscript into a broader context and should supply sufficient background information to allow the reader to understand and evaluate the results without referring to previous publications on the topic. As you compose the introduction, think of readers who are not experts in this field. Include a brief review of the key literature - use only those references required to provide the most salient background rather than an exhaustive review of the topic. Relevant controversies or disagreements in the field should be mentioned so that a non-expert reader can delve into these issues further. The introduction should conclude with a brief statement of the rationale for the study, the hypothesis that was addressed or the overall purpose of the experiments reported, and should provide a comment about whether that aim was achieved.

## Methods

This section should include sufficient technical information to enable the experiments to be reproduced. Protocols for new methods or significant modifications to existing methods should be included, while previously published or well established protocols should only be referenced. Describe new methods completely and give sources of unusual chemicals, equipment, strains etc. Studies presented should comply with our recommendations for distribution of materials and data (see below). In theoretical papers comprising the computational analyses, technical details (methods, models applied or newly developed) should be provided to enable the readers to reproduce the calculations.

## Results

This section should provide statistical analyses of all of the experiments that are required to support the conclusions of the paper. Reserve extensive interpretation of the results for the Discussion section. Details of experiments that are peripheral to the main thrust of the article and that detract from the focus of the article should not be included. Present the results as concisely as possible in text, table(s), or figure(s) (see below). Avoid extensive use of graphs to present data that might be more concisely presented in the text or tables. Graphs illustrating methods commonly used need not be shown except in unusual circumstances. Limit photographs to those that are absolutely necessary to show the experimental findings. Number figures and tables in the order in which they are cited in the text, and be sure to cite all figures and tables. Styles and fonts should match those in the main body of the article. Large datasets, including raw data, should be submitted as supporting files. The section may be divided into subsections, each with a concise subheading.

## Discussion

The Discussion should provide an interpretation of the results in relation to previously published work and to the experimental system used. It should not contain extensive repetition of the Results or reiteration of the Introduction. This section should spell out the major conclusions of the work along with some explanation or speculation on the significance of these conclusions. The discussion should be concise and tightly argued.

## Author contribution

For multi-authored publications, authors are requested to add an "Author contribution" section before the Acknowledgements Section, in which the contributions of all co-authors are briefly described, with the authors referred to using their initials. Example: "IGH and JB designed the experiments and CC carried them out. HD developed the model code and performed the simulations. AA prepared the manuscript with contributions from all co-authors."

In addition, it is also required to state the approach the sequence of authors were determined in. Example: "The authors applied the SDC approach for the sequence of authors." In this case SDC means

that the sequence of authors reflects the declining importance of their contribution. Please see <https://doi.org/10.1371/journal.pbio.0050018> for further details and categories.

## Acknowledgments

This section should describe sources of funding that have supported the work. Please also describe the role of the study sponsor(s), if any, in study design; collection, analysis, and interpretation of data; writing of the paper; and decision to submit it for publication. Recognition of personal assistance should be given as a separate paragraph: people who contributed to the work, but do not fit the criteria for authors should be listed along with their contributions. You must ensure that anyone named in the acknowledgments agrees to being so named.

## References

Please use the Vancouver/ICMJE style for the reference list.

Because all references will be linked electronically to the papers they cite, proper formatting of the references is crucial. A complete reference should give the reader enough information to find the relevant article. Please pay particular attention to spelling, capitalization and punctuation.

References to unpublished or submitted work, unpublished conference presentations, personal communications, patent applications and patents pending, computer software, databases, and websites should be referred to as such only in the body of the text. These should be kept to a minimum. The examples are as follows:

(J. Smith, unpublished data),

(J. Smith and P. Brown, submitted for publication),

(J. Smith, personal communication),

(J. Smith and P. Brown, presented at the 4th Symposium on Speleology, Overton, IL, 13 - 15 June 1989),

(J. C. Odell, April 1970, Process for batch culturing, U.S. patent 484,363,770),

Published or accepted ('in press') manuscripts, books and book chapters, and theses should be included in the reference list. References to published meeting abstracts should be kept to a minimum.

For all references, list the first six authors; add "et al." if there are additional authors. Standard abbreviations of journal names according to Thomson Scientific should be used (<http://ip-science.thomsonreuters.com/cgi-bin/jrnlst/jloptions.cgi?PC=master>).

Please use the Vancouver/ICMJE style for the reference list. See examples:

## Published Papers

[3] Gavrilov MB, Lukić T, Janc N, Basarin B, Marković SB. Forestry Aridity Index in Vojvodina, North Serbia. *Open Geosci.* 2019;11(1):367–77.

[4] Hatvani IG, Kovács J, Korponai J. Mintavételezési gyakoriság optimalizálása variogram függvényrel a Kis-Balaton Vízvédelmi Rendszer példáján (Optimization of sampling frequency using variograms on the example of the Kis-Balaton Water Protection System). *Termvéd Közl.* 2012;18:202–10 (in Hungarian with English summary).

## Accepted Papers

[15] Kereszturi G, Németh K. Structural and morphometrical irregularities of eroded scoria cones at Bakony–Balaton Highland Volcanic Field, Hungary. *Geomorphology*. Forthcoming 2010.

### Electronic Journal Articles

[3] García-Castellanos D, Vergés J, Gaspar-Escribano J, Cloetingh S. Interplay between tectonics, climate and fluvial transport during the Cenozoic evolution of the Ebro Basin (NE Iberia): from endorheic infill to exorheic erosion. *J Geophys Res.* 2003;108 B7: <https://doi.org/10.1029/2002JB002073>.

### Books and book chapters

[23] Landau K.R., Lifshitz E.M., *Theory of Elasticity*. Pergamon Press, Oxford, 1986.

[24] Tiepolo M. *Planning to cope with tropical and subtropical climate change*. Berlin, Boston: De Gruyter; 2020. <https://doi.org/10.1515/9783110480795>.

[25] Kowallis BJ, Christiansen EH, Blatter TK, Keith JD. Tertiary paleostress variation in time and space near the eastern margin of the Basin/Range province, Utah. In: Rossmanith HP, editor. *Mechanics of Jointed and Faulted Rock*. Rotterdam: Balkema; 1995. pp. 297–302.

### Theses

[26] Nairn IA. *Some studies of the geology, volcanic history and geothermal resources of the Okataina volcanic centre, Taupo Volcanic Zone, New Zealand*. PhD thesis, Victoria University of Wellington, New Zealand, 1981.

### Conference proceedings

[14] Kuerschner, Wolfram, and Steven Mueller. "Late Triassic (Carnian) Boreal vegetation and climate history and its relationship with the Wrangellia large igneous province." *EGU General Assembly Conference Abstracts*. Vol. 16. 2014.

[15] Petrova S, Lakova I, Ivanova D. "The Salash Formation in Western Srednogorie: lithology, age and boundaries." *Proceedings of the National Conference "Geosciences–2010"*, Sofia. 2010.

### [16] Newspaper articles

[18] Kluger J., *Global warming heats up*. Time Magazine, 26 March 2006, 1-7

[29] Sherman L., *How to calculate your carbon footprint*. Forbes, 15 April 2008, 18

### Maps

[78] Budai T., Csillag G., Dudko A., Koloszár L., *Geological map of the Balaton Highland (1:50 000)*. Magyar Állami Földtani Intézet, Budapest, Hungary, 1999

[21] Neall V.E., Sheets P19, P20 and P21 - *New Plymouth, Egmont and Manaia. Geological Map of New Zealand (1:50 000)*. Department of Scientific and Industrial Research, Wellington, New Zealand, 1979

### Reports

[11] Spiers C.J., Peach C.J., Brzesowsky R.H., Schutjens P.M.T.M., Liezenberg J.L., Zwart H.J., *Long-term rheological and transport properties of dry and wet salt rocks*. Nuclear Science and Technology, EUR 11848 EN, Office for Official Publications of the European Communities, Luxembourg, 1989

[97] Player, R.A. *Salt Plugs Study*. Iranian Oil Operating Companies, Geological and Exploration Division, Tehran, Report No. 1146, 1969

### Websites

[13] IPCC Fourth Assessment Report: Climate Change, 2007

[http://www.ipcc.ch/publications\\_and\\_data/ar4/wg1/en/contents.html](http://www.ipcc.ch/publications_and_data/ar4/wg1/en/contents.html)

References should be listed and numbered in the order that they appear in the text. In the text, citations should be indicated by the reference number in brackets [1]. Multiple citations within a single

set of brackets should be separated by commas [1,2]. Where there are more than three sequential citations, they should be given as a range [1-4]. References in figure captions and tables should be listed after references in the text.

### **Figures and Figure Legends**

Authors may use photographs, schemes, diagrams, line graphs and bar charts to illustrate their findings. Figures included with online submissions should be suitable for onscreen viewing and desktop printing. High resolution images should be provided on request or on manuscript acceptance. The figures and their lettering should be clear and easy to read, e.g., no labels should be too large or too small. Photomicrographs should include a scaled bar and indicate the size. We remind authors that it is not acceptable scientific conduct to modify any separate element within an image (adjustments of the entire image in brightness, contrast and color balance are justified only if they do not misrepresent the original, observed data). Composite figures composed of grouped images such as insets from different fields or separate parts of gels must be explained in the figure legend and differentiated by use of dividing lines or other means to make composites unambiguous. Figures should be numbered consecutively using Arabic numerals and referred to in the text by number. Figure legends should follow the main text, each on a separate page. Each figure legend should have a concise title and should provide enough information so that the figure is understandable without frequent reference to the text. It should inform the reader of key aspects of the figure, but the figure should also be discussed in the text. The legend should be succinct, while still explaining all symbols and abbreviations. Avoid lengthy descriptions of methods.

### **Tables and Table Captions**

Tables must include enough information to warrant table format and should be used only where information cannot be presented in the text. Tables should be typed as text, using either 'tabs' or a table editor for layout; please do not use graphics software to create tables. Tables occupying more than one printed page should be avoided, if possible; larger tables can be published as an appendix. Do not use picture elements, text boxes, tabs, or returns in tables. Tables that contain artwork, chemical structures, or shading must be submitted as illustrations. Tables should be numbered consecutively using Arabic numerals and referred to in the text by number. Table legends should follow the main text, each on a separate page. Each table should have an explanatory caption which should be as concise as possible. The headings should be sufficiently clear so that the meaning of the data is understandable without reference to the text. Footnotes can be used to explain abbreviations but should not include detailed descriptions of the experiment. Citations should be indicated using the same style as outlined above.

### **Equations**

In-line equations should be typed as text. The use of graphics programs and 'equation editors' should be avoided.

### **Abbreviations**

Please keep abbreviations to a minimum. Standard abbreviations of journal names according to the ISI standards (see <http://library.caltech.edu/reference/abbreviations/>). Non-standard abbreviations should not be used unless they appear at least three times in the text. List all non-standard abbreviations, acronyms and symbols in alphabetical order, along with their expanded form, at the end of the text. Define them as well upon first use in the text.

### **Supplemental Material**



We encourage authors to submit essential supplementary files that additionally support the authors' conclusions along with their manuscripts (the principal conclusions should be fully supported without referral to the supplemental material). Supplemental material will always remain associated with its article and is not subject to any modifications after publication. The decision to publish the material with the article if it is accepted will be made by the Editor. Supporting files of no more than 10 MB in may be submitted in a variety of formats, but should be publication-ready, as these files will be published exactly as supplied. Material must be restricted to large or complex data sets or results that cannot be readily displayed because of space or technical limitations. Material that has been published previously is not acceptable for posting as supplemental material.

Supporting files should fall into one of the following categories:

- Dataset
- Additional Figure or Table
- Text
- Protocol
- Multimedia - Audio/Video/Animations (AVI, MPEG, WAV, Quicktime, animated GIF or Flash)

If the software required for users to view/use the supplemental material is not embedded in the file, you are urged to use shareware or generally available/easily accessible programs. To prevent any misunderstandings, we request that authors submit a text file (instruction.txt) containing a brief instruction on how to use the files supplied. All supporting information should be referred to in the manuscript, with titles (and, if desired, legends) for all files listed under the heading 'Supporting Information'.

## Nomenclature

We strongly recommend the use of correct and established nomenclature wherever possible. Always report numerical data (length, weight, and volume) in the appropriate SI units. Please refer to International Union of Pure and Applied Chemistry (IUPAC) recommendations available for standard metric units. For these units and for molarity, use the prefixes (p= 10<sup>-12</sup>, n = 10<sup>-9</sup>, μ= 10<sup>-6</sup>, m = 10<sup>-3</sup>, c = 10<sup>-2</sup>, d = 10<sup>-1</sup>, h = 10<sup>2</sup>, k = 10<sup>3</sup>, M = 10<sup>6</sup>, G = 10<sup>9</sup>, etc.). Use μg/ml or μg/g in place of the ambiguous ppm. When fractions are used to express units, it is preferable to use whole units, such as 'g' or 'min', in the denominator instead of fractional or multiple units, such as μg or 10 min (for example 'pmol/min' is preferable to 'nmol/10 min', and 'μmol/g' is preferable to 'nmol/μg'). It is also preferable that an unambiguous form such as exponential notation be used; for example, 'μmol g<sup>-1</sup> min<sup>-1</sup>' is preferable to 'μmol/g/min'. Units of temperature are presented in degrees centigrade (i.e. 37°C).

## Formatting and Typesetting

All pages must be numbered consecutively. The whole text (including legends, footnotes, and references) should be formatted double-spaced with no hyphenation and automatic word-wrap (no hard returns within paragraphs). Please type your text consistently, e.g. take care to distinguish between '1' (one), 'l' (capital l) and 'l' (lower-case l) and '0' (zero) and 'O' (capital O), etc. Manuscript pages should have line numbers. The font size should be no smaller than 12 points.

Footnotes and endnotes should be avoided. Allowable footnotes/endnotes may include: the designation of the corresponding author of the paper, the current address of an author (if different from that shown in the affiliation), abbreviations and acronyms.

Do not create symbols as graphics or use special fonts that are external to your word processing program; use the "insert symbol" function. Indicate paragraph lead-ins in bold type and italicize any words that should appear in italics. All Latin names should be italicized, including species names and common structures such as: et al.; in vivo; in vitro; ex vivo; in silico; etc.; de novo; a priori; ab initio; vice versa; in situ; ad hoc; sensu stricto; i.e.; ca. /circa; n.b. /nota bene. Decimal multiples or

submultiples of units are indicated by the use of prefixes. There should be a single space between most units and the corresponding number; the only exceptions are: 1%, 1‰, 1°C, 1°, 1', 1".

## DISTRIBUTION OF MATERIALS AND DATA

The publication of an article in the journal is subject to the understanding that authors will make all data and associated protocols available to readers on request. The Methods section should include details of how materials and information may be obtained. In cases of dispute, authors may be required to make any primary data available to the Managing Editor.

## COPYRIGHT

All authors retain copyright, unless – due to their local circumstances – their work is not copyrighted. The copyrights are governed by the [Creative-Commons Attribution Only license \(CC-BY\)](#) which is compliant with Plan-S. We may also publish a paper under CC-BY-NC-ND license on author's request. The corresponding author grants the journal exclusive license to use of the article, by signing the License to Publish. Scanned copy of license should be sent to the journal, as soon as possible.

## OUTLINE OF THE PRODUCTION PROCESS

Once an article has been accepted for publication, the manuscript files are transferred into our production system to be language-edited and formatted. Language and technical editors reserve the privilege of editing manuscripts to conform with the stylistic conventions of the journal. Once the article has been typeset, PDF proofs are generated so that authors can approve all editing and layout.

### Electronic Proofs

Proofreading should be carried out once a final draft has been produced. Since the proofreading stage is the last opportunity to correct the article to be published, the authors are requested to make every effort to check for errors in their proofs before the paper is posted online. Please note that only essential changes can be made at this stage and extensive corrections, additions, or deletions will not be allowed. Limit changes to correction of spelling errors, incorrect data, grammatical errors, and updated information for references to articles that have been submitted or are in press. If URLs have been provided in the article, recheck the sites to ensure that the addresses are still accurate and the material that you expect the reader to find is indeed there. Important new information that has become available between acceptance of the manuscript and receipt of the proofs may be inserted into the proof with the permission of the editor.

Additionally, authors may be asked to address remarks and queries from the language and/or technical editors. Queries are written only to request necessary information or clarification of an unclear passage or to draw attention to edits that may have altered the sense. Please note that language/technical editors do not query at every instance where a change has been made. It is the author's responsibility to read the entire text, tables, and figure legends, not just items queried. Major alterations made will always be submitted to the authors for approval.

Manuscripts submitted under multiple authorship are published on the assumption that the final version of the manuscript has been seen and approved by all authors. The Corresponding author will receive e-mail notification when a downloadable PDF file is available and should return comments on the proofs within a maximum of 3 days of receipt. Comments should be e-mailed to Managing Editor. Please note that they should not be faxed, nor mailed or sent by a courier service to the Editorial Office.
